# Supplementary material for: Secondary Metabolite Profiling, Anti-Inflammatory and Hepatoprotective Activity of Neptunia triquetra (Vahl) Benth
Source: MDPI journal article supplement (doi:10.3390/molecules26237353), 2021-12-03
Supplement: s1 [file s1]

# Supplementary File S1: Gas Chromatographic Mass spectrometric Studies

**Figure S1: Chromatogram of Chloroform extract of *Neptunia triquetra* (Vahl) Benth. Roots**

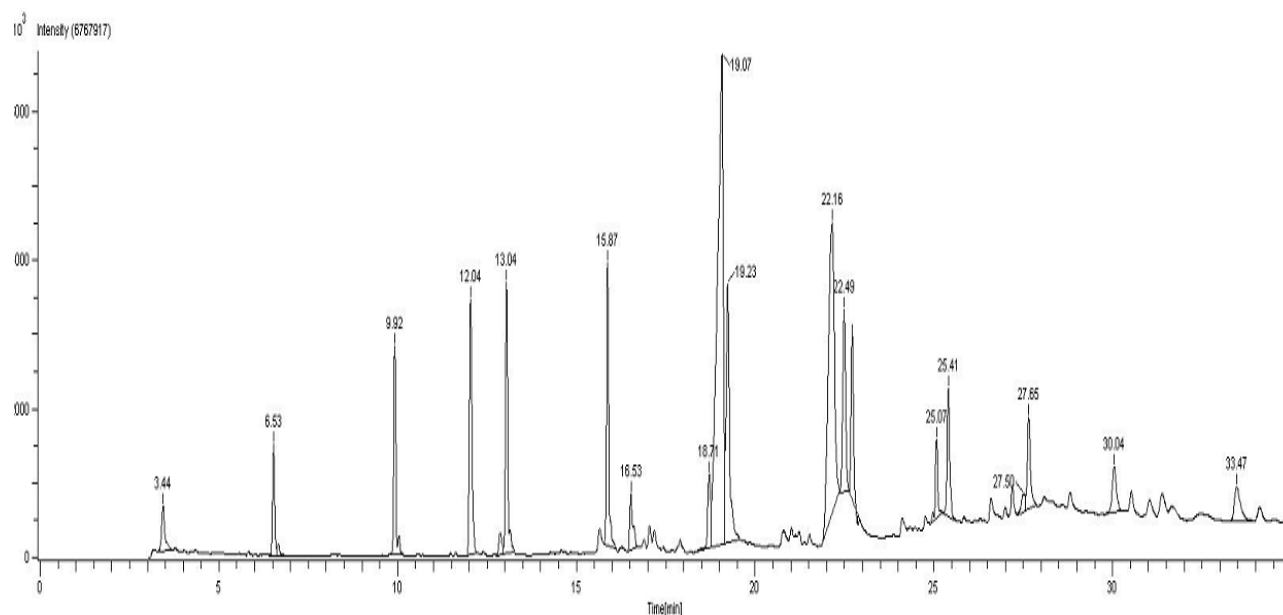

**Table S1: Compounds identified in the Chloroform extract of *Neptunia triquetra* (Vahl) Benth. Roots**

| S. No. | RT    | Name of Compound                                                              | Peak Area % | MW  | MF                                              |
|--------|-------|-------------------------------------------------------------------------------|-------------|-----|-------------------------------------------------|
| 1.     | 9.92  | 1-Tetradecene                                                                 | 4.19        | 196 | C <sub>14</sub> H <sub>28</sub>                 |
| 2.     | 12.04 | Phenol 2,4-bis(1,1-dimethylethyl)-                                            | 6.08        | 206 | C <sub>14</sub> H <sub>22</sub> O               |
| 3.     | 13.04 | 1-Hexadecene                                                                  | 5.61        | 224 | C <sub>16</sub> H <sub>32</sub>                 |
| 4.     | 15.87 | 3-Octadecene,(E)-                                                             | 5.72        | 252 | C <sub>18</sub> H <sub>36</sub>                 |
| 5.     | 16.53 | 3,7,11,15-Tetramethyl-2-hexadecen-1-ol                                        | 1.60        | 296 | C <sub>20</sub> H <sub>40</sub> O               |
| 6.     | 19.07 | n-Hexadecanoic acid                                                           | 25.86       | 256 | C <sub>16</sub> H <sub>32</sub> O <sub>2</sub>  |
| 7.     | 19.23 | 1-Nonadecene                                                                  | 8.16        | 266 | C <sub>19</sub> H <sub>38</sub>                 |
| 8.     | 22.16 | 9,12-Octadecadienoic acid (Z,Z)-                                              | 16.13       | 280 | C <sub>18</sub> H <sub>32</sub> O <sub>2</sub>  |
| 9.     | 22.49 | Octadecanoic acid                                                             | 4.84        | 284 | C <sub>18</sub> H <sub>36</sub> O <sub>2</sub>  |
| 10.    | 22.71 | 9-Eicosene, (E)-                                                              | 3.62        | 280 | C <sub>20</sub> H <sub>40</sub>                 |
| 11.    | 25.07 | S-Indacene, 1,2,3,5,6,7-hexahydro-1,1,5,5-tetramethyl-4,8-bis(3-methylbutyl)- | 1.80        | 354 | C <sub>26</sub> H <sub>42</sub>                 |
| 12.    | 27.50 | 3',8,8'-Trimethoxy -3-piperidyl-2,2'-binaphthalene-1.1',4,4'-tetrone          | 0.59        | 487 | C <sub>28</sub> H <sub>25</sub> NO <sub>7</sub> |
| 13.    | 27.65 | Cis-13-Eicosenoic acid                                                        | 2.64        | 310 | C <sub>20</sub> H <sub>38</sub> O <sub>2</sub>  |

**Figure S2: Chromatogram of Dichloromethane extract of *Neptunia triquetra* (Vahl) Benth. Roots**

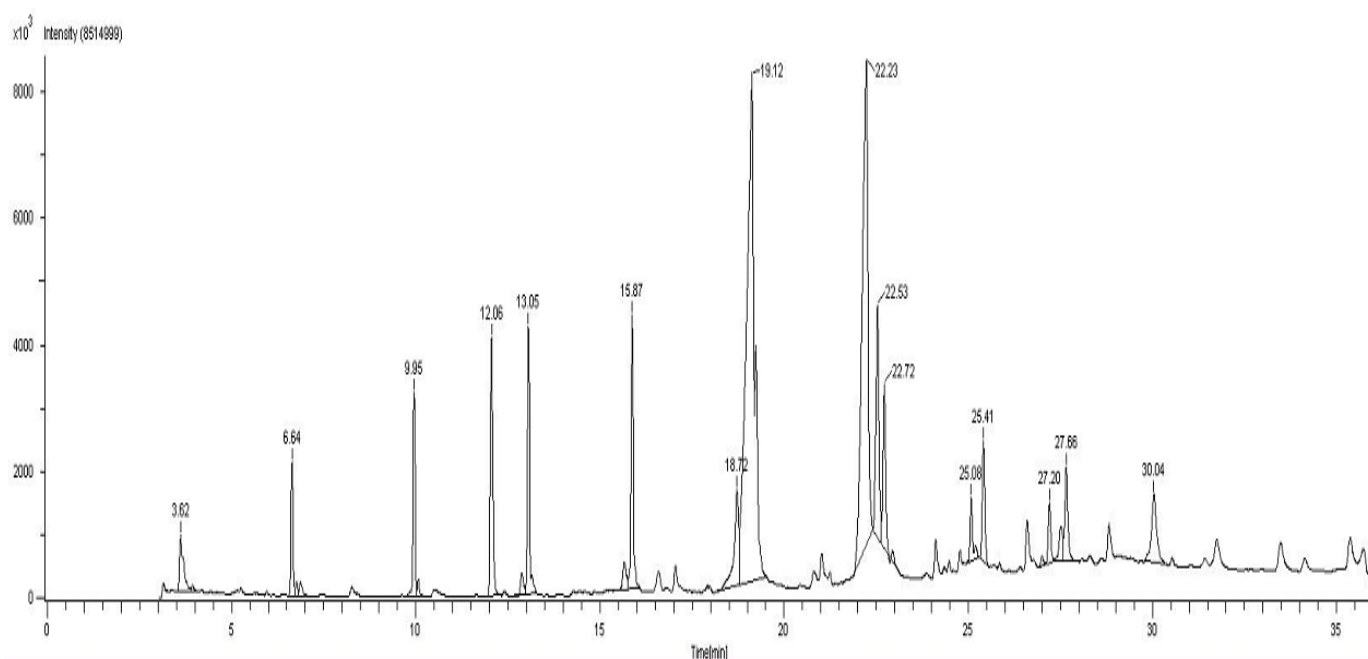

**Table S2: Compounds identified in the Dichloromethane extract of *Neptunia triquetra* (Vahl) Benth. Roots.**

| S. No. | RT    | Name of Compound                                                              | Peak Area % | MW  | MF                                                            |
|--------|-------|-------------------------------------------------------------------------------|-------------|-----|---------------------------------------------------------------|
| 1.     | 3.62  | 1-Decene                                                                      | 1.71        | 140 | C <sub>10</sub> H <sub>20</sub>                               |
| 2.     | 6.64  | 1-Dodecene                                                                    | 2.13        | 168 | C <sub>12</sub> H <sub>24</sub>                               |
| 3.     | 12.06 | Phenol,2,4-bis[1,1-dimethylethyl]-                                            | 4.99        | 206 | C <sub>14</sub> H <sub>22</sub> O                             |
| 4.     | 13.05 | 1-Hexadecene                                                                  | 4.60        | 224 | C <sub>16</sub> H <sub>32</sub>                               |
| 5.     | 15.87 | 1-Hexadecene                                                                  | 5.01        | 224 | C <sub>16</sub> H <sub>32</sub>                               |
| 6.     | 19.12 | n-Hexadecanoic acid                                                           | 31.21       | 256 | C <sub>16</sub> H <sub>32</sub> O <sub>2</sub>                |
| 7.     | 22.23 | Oleic acid                                                                    | 21.59       | 282 | C <sub>18</sub> H <sub>34</sub> O <sub>2</sub>                |
| 8.     | 22.53 | Octadecanoic acid                                                             | 5.38        | 284 | C <sub>18</sub> H <sub>36</sub> O <sub>2</sub>                |
| 9.     | 22.72 | 1-Docosene                                                                    | 3.26        | 308 | C <sub>22</sub> H <sub>44</sub>                               |
| 10.    | 25.08 | S-Indacene, 1,2,3,5,6,7-hexahydro-1,1,5,5-tetramethyl-4,8-bis(3-methylbutyl)- | 1.34        | 354 | C <sub>26</sub> H <sub>42</sub>                               |
| 11.    | 25.41 | 1-Docosene                                                                    | 2.39        | 308 | C <sub>22</sub> H <sub>44</sub>                               |
| 12.    | 27.66 | Octatriacontyl pentafluoropropionate                                          | 2.19        | 696 | C <sub>41</sub> H <sub>77</sub> F <sub>5</sub> O <sub>2</sub> |

**Figure S3: Chromatogram of Ethanol extract of *Neptunia triquetra* (Vahl) Benth. Roots**

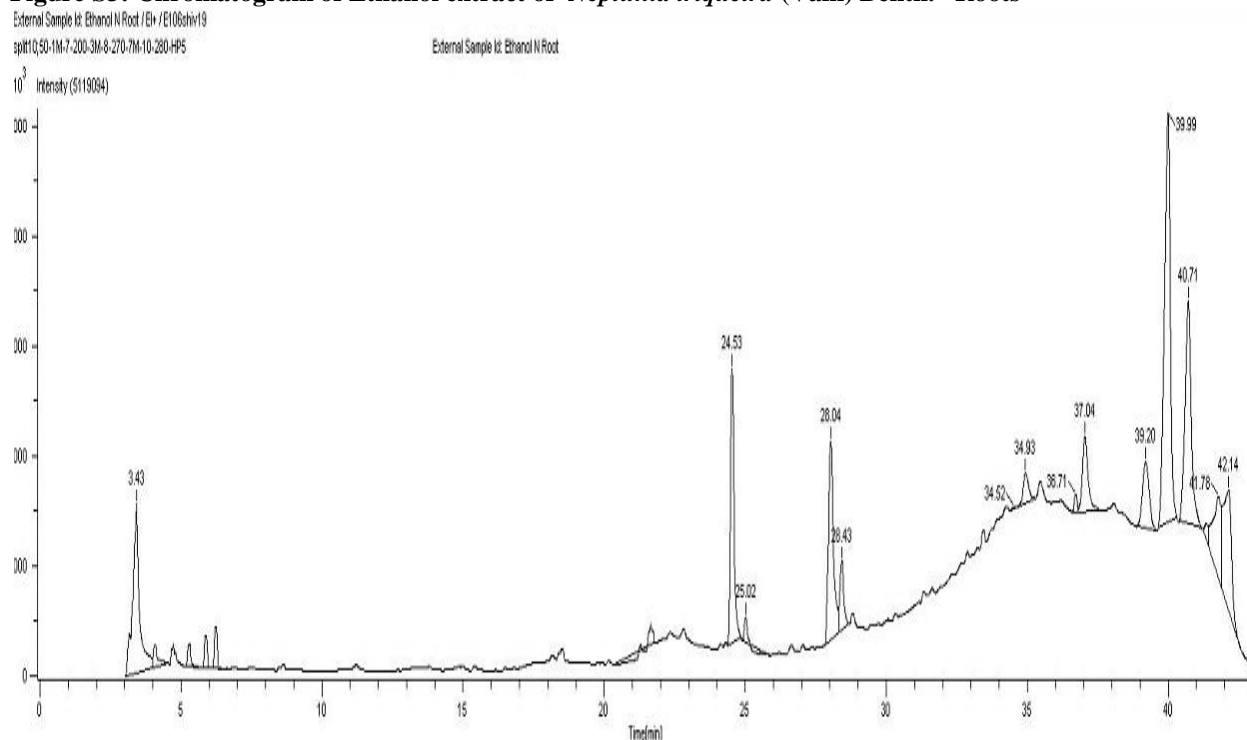

**Table S3: Compounds identified in the Ethanol extract of *Neptunia triquetra* (Vahl) Benth. Roots.**

| S. No. | RT    | Name of Compound                                                            | Peak Area % | MW  | MF                                             |
|--------|-------|-----------------------------------------------------------------------------|-------------|-----|------------------------------------------------|
| 1.     | 5.31  | 1,3-Dioxane,4,4-dimethyl-                                                   | 0.67        | 116 | C <sub>6</sub> H <sub>12</sub> O <sub>2</sub>  |
| 2.     | 6.25  | Butane,1,1-diethoxy-3-methyl-                                               | 1.11        | 160 | C <sub>9</sub> H <sub>20</sub> O <sub>2</sub>  |
| 3.     | 8.62  | Propane,1,1,3-triethoxy                                                     | 0.24        | 176 | C <sub>9</sub> H <sub>20</sub> O <sub>3</sub>  |
| 4.     | 18.52 | Hexadecene                                                                  | 0.46        | 226 | C <sub>16</sub> H <sub>34</sub>                |
| 5.     | 21.65 | 1-Hexadecanol,2-methyl-                                                     | 0.63        | 256 | C <sub>17</sub> H <sub>36</sub> O              |
| 6.     | 25.02 | Hexadecanoic acid,ethyl ester                                               | 0.37        | 284 | C <sub>18</sub> H <sub>36</sub> O <sub>2</sub> |
| 7.     | 28.04 | Oleic acid                                                                  | 9.70        | 282 | C <sub>18</sub> H <sub>34</sub> O <sub>2</sub> |
| 8.     | 37.04 | Stigmasterol                                                                | 4.09        | 412 | C <sub>29</sub> H <sub>48</sub> O              |
| 9.     | 39.20 | Tricyclo[20.8.0.0(7,16)]triacontane,1(22),7(16)-diepoxy-                    | 4.27        | 444 | C <sub>30</sub> H <sub>52</sub> O <sub>2</sub> |
| 10.    | 39.99 | Scandenone                                                                  | 2.29        | 404 | C <sub>25</sub> H <sub>24</sub> O <sub>5</sub> |
| 11.    | 40.71 | 3,3'-Dimethyl-1'-hydroxy-5,8-dimethoxy-2,2'-binaphthalene-1,4,5',8'-tetrone | 13.78       | 418 | C <sub>24</sub> H <sub>18</sub> O <sub>7</sub> |
| 12.    | 42.14 | 24,25-Dihydroxyvitamin D                                                    | 9.28        | 416 | C <sub>27</sub> H <sub>44</sub> O <sub>3</sub> |

**Figure S4: Chromatogram of Chloroform extract of *Neptunia triquetra* (Vahl) Benth. Stem**

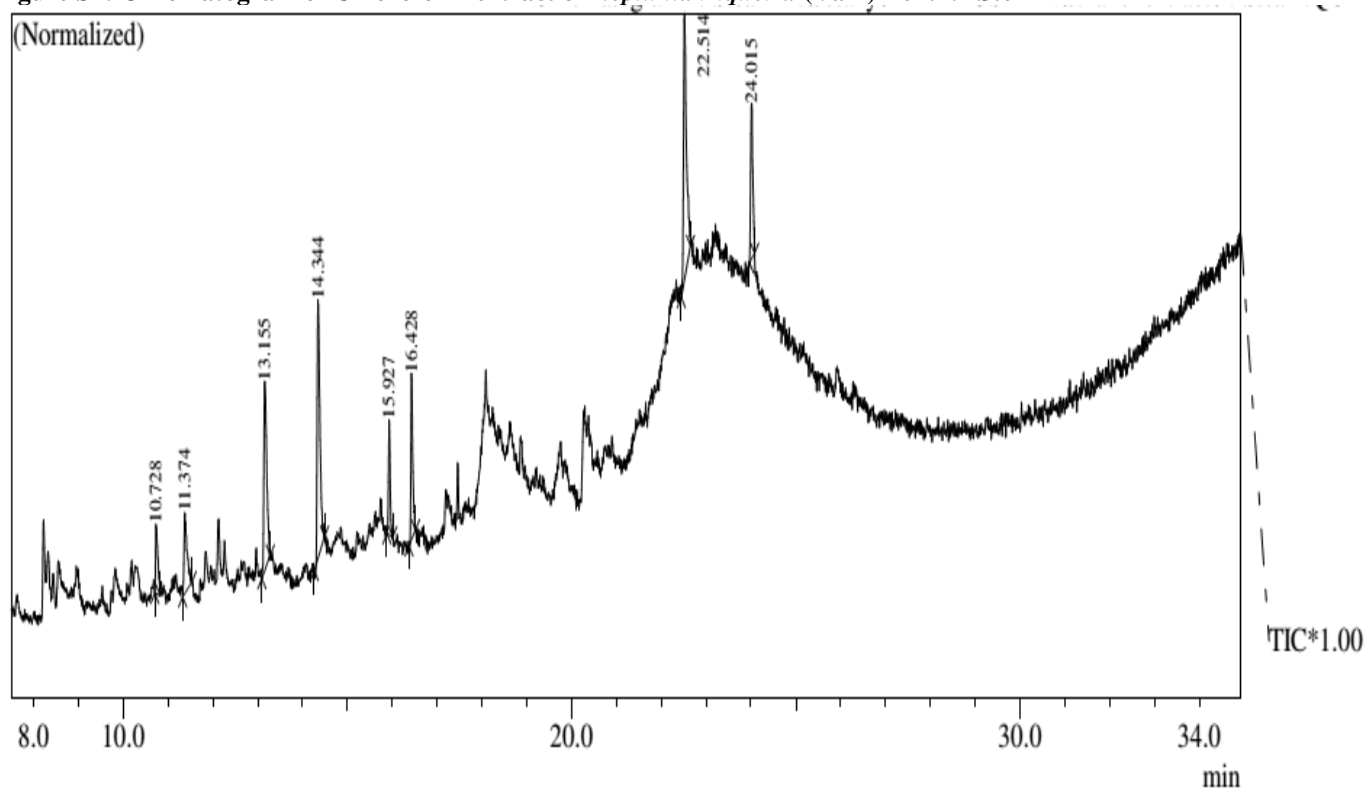

**Table S4: Compounds identified in the Chloroform extract of *Neptunia triquetra* (Vahl) Benth. Stem.**

| S. No. | RT     | Name of Compound                                    | Peak Area % | MW  | MF                                            |
|--------|--------|-----------------------------------------------------|-------------|-----|-----------------------------------------------|
| 1.     | 10.728 | 1-Butylpyrrolidine                                  | 4.95        | 127 | C <sub>8</sub> H <sub>17</sub> N              |
| 2.     | 11.374 | 2,4,5-Trihydroxypyrimidine                          | 7.50        | 128 | C <sub>6</sub> H <sub>8</sub> O <sub>3</sub>  |
| 3.     | 13.155 | 4H-Pyran-4-one, 2,3-dihydro-3,5-dihydroxy-6-methyl- | 15.73       | 144 | C <sub>6</sub> H <sub>8</sub> O <sub>4</sub>  |
| 4.     | 14.344 | 2,3-dihydrobenzofuran (Dihydrocoumarone)            | 21.99       | 120 | C <sub>8</sub> H <sub>8</sub> O               |
| 5.     | 15.927 | 4-Hydroxy-2-methylacetophenone                      | 5.80        | 150 | C <sub>9</sub> H <sub>10</sub> O <sub>2</sub> |
| 6.     | 16.428 | Phenol, 2,6-dimethoxy-                              | 9.19        | 154 | C <sub>8</sub> H <sub>10</sub> O <sub>3</sub> |
| 7.     | 22.514 | Phenol, 4-propoxy-                                  | 24.65       | 152 | C <sub>9</sub> H <sub>12</sub> O <sub>2</sub> |
| 8.     | 24.015 | 3-Butylindolizidine                                 | 10.20       | 181 | C <sub>12</sub> H <sub>23</sub> N             |

**Figure S5: Chromatogram of Dichloromethane extract of *Neptunia triquetra* (Vahl) Benth. Stem**

this data shouldn't be used for advt., evidence or litigation:

Experiment Date/Time: 4/27/2016 1:46:26 PM

Acq. Data Name: 16

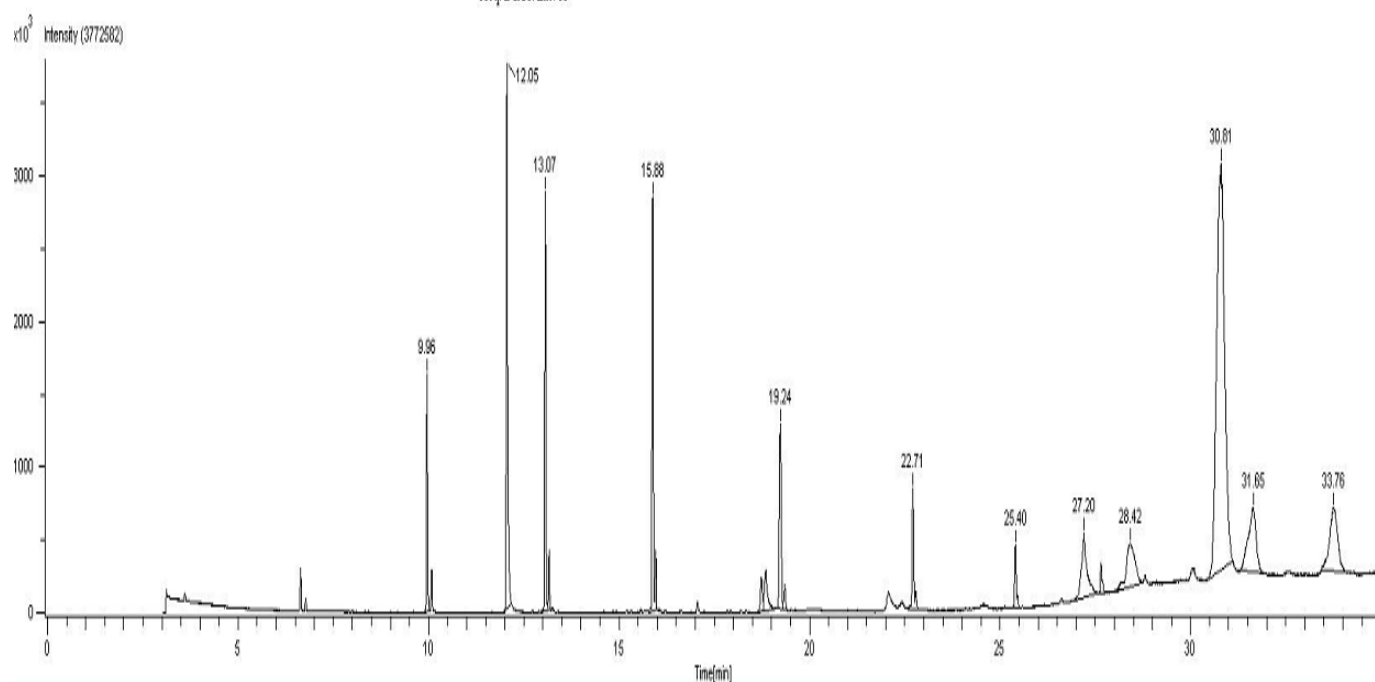

**Table S5: Compounds identified in the Dichloromethane extract of *Neptunia triquetra* (Vahl) Benth. Stem**

| S. No. | RT    | Name of Compound                   | Peak Area % | MW  | MF                                             |
|--------|-------|------------------------------------|-------------|-----|------------------------------------------------|
| 1.     | 12.05 | Phenol,2,4-bis[1,1-dimethylethyl]- | 9.80        | 206 | C <sub>14</sub> H <sub>22</sub> O              |
| 2.     | 15.88 | 1-Nonadecene                       | 6.74        | 266 | C <sub>19</sub> H <sub>38</sub>                |
| 3.     | 18.85 | n-Hexadecanoic acid                | 1.56        | 256 | C <sub>16</sub> H <sub>32</sub> O <sub>2</sub> |
| 4.     | 27.20 | Campesterol                        | 4.30        | 400 | C <sub>28</sub> H <sub>48</sub> O              |
| 5.     | 28.42 | Stigmasterol                       | 4.80        | 412 | C <sub>29</sub> H <sub>48</sub> O              |
| 6.     | 30.81 | γ-Sitosterol                       | 40.15       | 414 | C <sub>29</sub> H <sub>50</sub> O              |
| 7.     | 31.65 | α-Amyrin                           | 6.60        | 426 | C <sub>30</sub> H <sub>50</sub> O              |
| 8.     | 33.76 | Cycloartenol acetate               | 6.45        | 468 | C <sub>32</sub> H <sub>52</sub> O <sub>2</sub> |

**Figure S6: Chromatogram of Ethanol extract of *Neptunia triquetra* (Vahl) Benth. Stem**

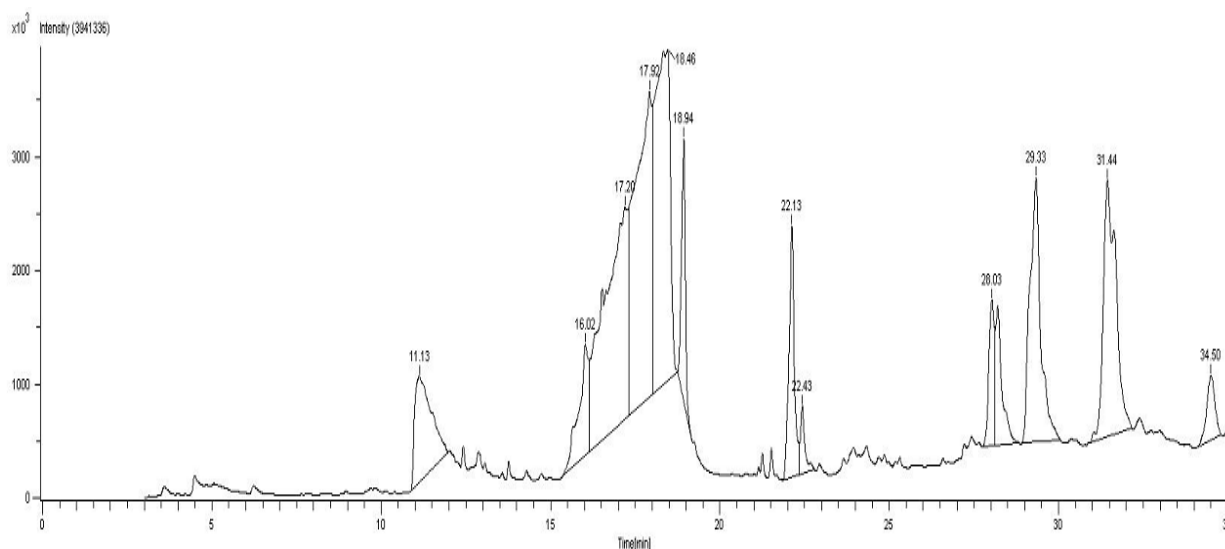

**Table S6: Compounds identified in the Ethanol extract of *Neptunia triquetra* (Vahl) Benth. stem**

| S. No. | RT    | Name of Compound                                                            | Peak Area % | MW  | MF                                                |
|--------|-------|-----------------------------------------------------------------------------|-------------|-----|---------------------------------------------------|
| 1.     | 4.50  | 1,2,3-Benzenetriol                                                          | 0.76        | 126 | C <sub>6</sub> H <sub>6</sub> O <sub>3</sub>      |
| 2.     | 11.13 | Pyrogallol                                                                  | 5.94        | 126 | C <sub>6</sub> H <sub>6</sub> O <sub>3</sub>      |
| 3.     | 16.02 | Desulphosinigrin                                                            | 3.71        | 279 | C <sub>10</sub> H <sub>17</sub> NO <sub>6</sub> S |
| 4.     | 17.20 | 3-O-Methyl-d-glucose                                                        | 17.72       | 194 | C <sub>7</sub> H <sub>14</sub> O <sub>6</sub>     |
| 5.     | 18.46 | 3-O-Methyl-d-glucose                                                        | 17.08       | 194 | C <sub>7</sub> H <sub>14</sub> O <sub>6</sub>     |
| 6.     | 18.94 | n-Hexadecanoic acid                                                         | 3.46        | 256 | C <sub>16</sub> H <sub>32</sub> O <sub>2</sub>    |
| 7.     | 21.52 | Phytol                                                                      | 0.24        | 296 | C <sub>20</sub> H <sub>40</sub> O                 |
| 8.     | 22.13 | Linolenic acid                                                              | 4.49        | 278 | C <sub>18</sub> H <sub>30</sub> O <sub>2</sub>    |
| 9.     | 22.43 | Octadecanoic acid                                                           | 1.01        | 284 | C <sub>18</sub> H <sub>36</sub> O <sub>2</sub>    |
| 10.    | 29.33 | Stigmasterol                                                                | 9.80        | 412 | C <sub>29</sub> H <sub>48</sub> O                 |
| 11.    | 31.44 | 3,3'-Dimethyl-1'-hydroxy-5,8-dimethoxy-2,2'-binaphthalene-1,4,5',8'-tetrone | 11.09       | 418 | C <sub>24</sub> H <sub>18</sub> O <sub>7</sub>    |
| 12.    | 31.64 | γ-Sitosterol                                                                | 8.88        | 414 | C <sub>29</sub> H <sub>50</sub> O                 |
| 13.    | 34.50 | Lupeol                                                                      | 1.80        | 426 | C <sub>30</sub> H <sub>50</sub> O                 |

**Figure S7: Chromatogram of Chloroform extract of *Neptunia triquetra* (Vahl) Benth. Leaves**

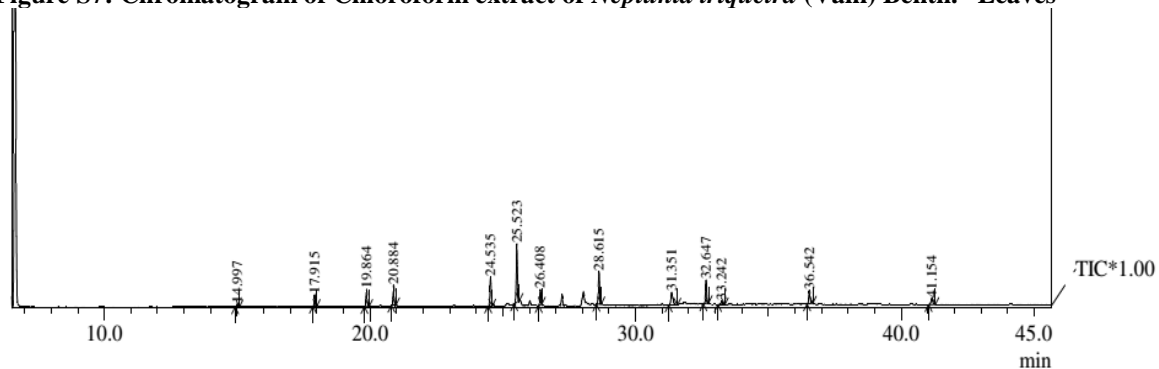

**Table S7: Compounds identified in the Chloroform extract of *Neptunia triquetra* (Vahl) Benth. Leaves**

| S. No. | RT     | Name of Compound                             | Peak Area % | MW  | MF                                             |
|--------|--------|----------------------------------------------|-------------|-----|------------------------------------------------|
| 1.     | 14.997 | 1-Dodecanol                                  | 1.02        | 186 | C <sub>12</sub> H <sub>26</sub> O              |
| 2.     | 17.915 | 1-Tetradecano                                | 3.88        | 214 | C <sub>14</sub> H <sub>30</sub> O              |
| 3.     | 19.864 | Phenol, 3,5-bis(1,1-dimethylethyl)-          | 7.03        | 206 | C <sub>14</sub> H <sub>22</sub> O              |
| 4.     | 20.884 | 1-Pentadecene                                | 6.64        | 210 | C <sub>15</sub> H <sub>30</sub>                |
| 5.     | 24.535 | 1-Octadecanol                                | 11.56       | 270 | C <sub>18</sub> H <sub>38</sub> O              |
| 6.     | 25.523 | 3,7,11,15-Tetramethyl-2-hexadecen-1-ol       | 22.27       | 296 | C <sub>20</sub> H <sub>40</sub> O              |
| 7.     | 26.408 | 3,7,11,15-Tetramethyl-2-hexadecen-1-ol       | 5.98        | 296 | C <sub>20</sub> H <sub>40</sub> O              |
| 8.     | 28.615 | 1-Heptadecanol                               | 12.40       | 256 | C <sub>17</sub> H <sub>36</sub> O              |
| 9.     | 31.351 | Dihydrogeraniol                              | 8.74        | 156 | C <sub>10</sub> H <sub>20</sub> O              |
| 10.    | 32.647 | Behenic alcohol                              | 8.76        | 326 | C <sub>22</sub> H <sub>46</sub> O              |
| 11.    | 33.242 | Bicyclo[3.1.1]heptan-3-one, 2,6,6-trimethyl- | 1.83        | 152 | C <sub>10</sub> H <sub>16</sub> O              |
| 12.    | 36.542 | 1-Nonadecene                                 | 6.14        | 266 | C <sub>19</sub> H <sub>38</sub>                |
| 13.    | 41.154 | 1-Heneicosyl formate                         | 3.76        | 340 | C <sub>22</sub> H <sub>44</sub> O <sub>2</sub> |

**Figure S8: Chromatogram of Dichloromethane extract of *Neptunia triquetra* (Vahl) Benth. Leaves**

msl Sample Id: DCM N Leaf/ EI+

this data shouldn't be used for advt., evidence or litigation:  
Acq. Data Name: E106shr13

Internal Sample Id: split10\_50-1M-6-300-3M-8-270-5M-10-280-HP3  
Experiment Date/Time: 1/28/2016 12:30:08 PM

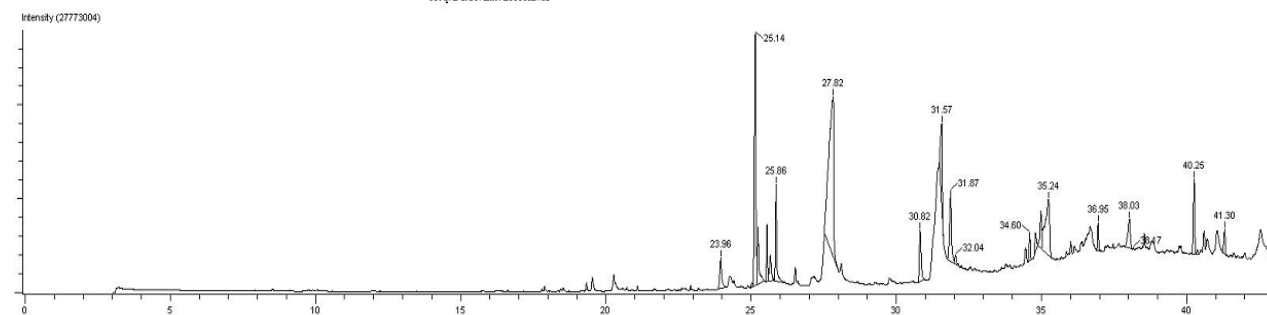

**Table S8: Compounds identified in the Dichloromethane extract of *Neptunia triquetra* (Vahl) Benth. Leaves.**

| S. No. | RT    | Name of Compound                                              | Peak Area % | MW  | MF                                             |
|--------|-------|---------------------------------------------------------------|-------------|-----|------------------------------------------------|
| 1.     | 17.89 | Humelene                                                      | 0.46        | 204 | C <sub>15</sub> H <sub>24</sub>                |
| 2.     | 19.53 | 2(4H)-Benzofuranone, 5,6,7,7a-terahydro-4,4,7a-trimethyl-(R)- | 0.76        | 180 | C <sub>11</sub> H <sub>16</sub> O <sub>2</sub> |
| 3.     | 20.28 | Dodecanoic acid                                               | 1.00        | 200 | C <sub>12</sub> H <sub>24</sub> O <sub>2</sub> |
| 4.     | 23.95 | Tetradecanoic acid                                            | 1.28        | 228 | C <sub>14</sub> H <sub>28</sub> O <sub>2</sub> |
| 5.     | 25.14 | 3,7,11,15-Tetramethyl-2-hexadecen-1-ol                        | 10.10       | 296 | C <sub>20</sub> H <sub>40</sub> O              |
| 6.     | 25.24 | 2-Pentadecanone, 6,10,14-trimethyl-                           | 1.86        | 268 | C <sub>18</sub> H <sub>36</sub> O              |
| 7.     | 25.56 | 3,7,11,15-Tetramethyl-2-hexadecen-1-ol                        | 2.37        | 296 | C <sub>20</sub> H <sub>40</sub> O              |
| 8.     | 27.80 | n-Hexadecanoic acid                                           | 26.59       | 256 | C <sub>16</sub> H <sub>32</sub> O <sub>2</sub> |
| 9.     | 30.83 | Phytol                                                        | 2.35        | 296 | C <sub>20</sub> H <sub>40</sub> O              |
| 10.    | 31.54 | Linolenic acid                                                | 18.79       | 278 | C <sub>18</sub> H <sub>30</sub> O <sub>2</sub> |
| 11.    | 31.86 | Octadecanoic acid                                             | 3.28        | 284 | C <sub>18</sub> H <sub>36</sub> O <sub>2</sub> |
| 12.    | 38.02 | Octadecane, 3-ethyl-5-(2-ethylbutyl)                          | 2.02        | 366 | C <sub>26</sub> H <sub>54</sub>                |
| 13.    | 40.60 | Squalene                                                      | 1.58        | 410 | C <sub>30</sub> H <sub>50</sub>                |
| 14.    | 42.55 | Octadecane, 3-ethyl-5-(2-ethylbutyl)                          | 3.25        | 366 | C <sub>26</sub> H <sub>54</sub>                |



**Figure S9: Chromatogram of Ethanol extract of *Neptunia triquetra* (Vahl) Benth. Leaves**

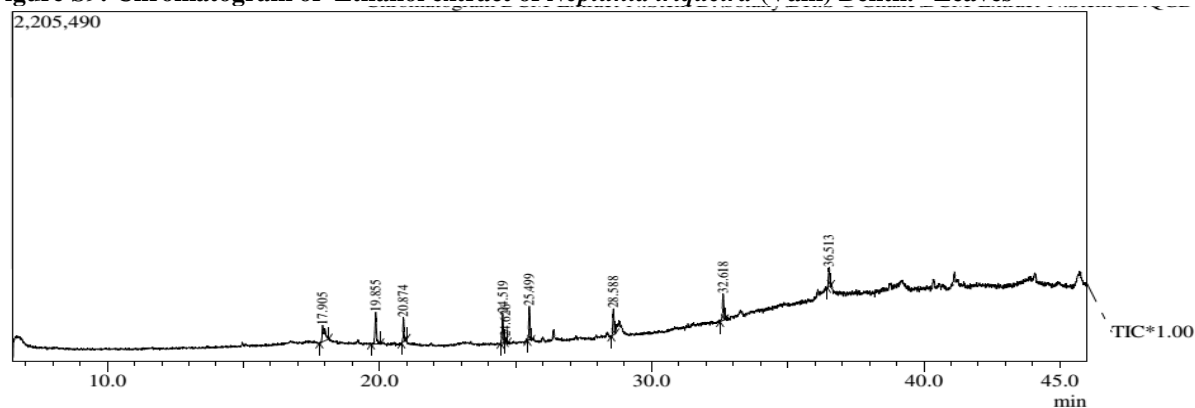

**Table S9: Compounds identified in the Ethanol extract of *Neptunia triquetra* (Vahl) Benth. Leaves.**

| S. No. | RT     | Name of Compound                       | Peak Area % | MW  | MF                                |
|--------|--------|----------------------------------------|-------------|-----|-----------------------------------|
| 1.     | 17.905 | 1-Heptadecene                          | 14.60       | 238 | C <sub>17</sub> H <sub>34</sub>   |
| 2.     | 19.855 | Phenol, 2,4-bis(1,1-dimethylethyl)-    | 15.91       | 206 | C <sub>14</sub> H <sub>22</sub> O |
| 3.     | 20.874 | 1-Heptadecanol                         | 8.95        | 256 | C <sub>17</sub> H <sub>36</sub> O |
| 4.     | 24.519 | 1-Octadecanol                          | 12.39       | 270 | C <sub>18</sub> H <sub>38</sub> O |
| 5.     | 24.626 | Norphytan                              | 1.65        | 268 | C <sub>19</sub> H <sub>40</sub>   |
| 6.     | 25.499 | 3,7,11,15-Tetramethyl-2-hexadecen-1-ol | 15.14       | 296 | C <sub>20</sub> H <sub>40</sub> O |
| 7.     | 28.588 | 1-Nonadecene                           | 11.23       | 266 | C <sub>19</sub> H <sub>38</sub>   |
| 8.     | 32.618 | Behenic alcohol                        | 12.01       | 326 | C <sub>22</sub> H <sub>46</sub> O |
| 9.     | 36.513 | 1-Eicosanol                            | 8.10        | 298 | C <sub>20</sub> H <sub>42</sub> O |

## Molecular structures of Identified Secondary Metabolites

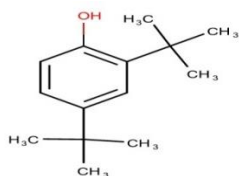

Phenol, 2,4-bis[1,1-dimethylethyl]-

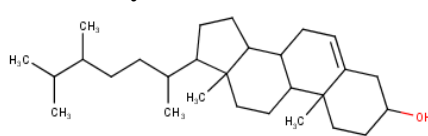

Campesterol

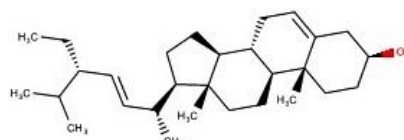

Stigmasterol

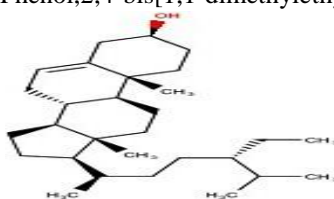

γ-Sitosterol

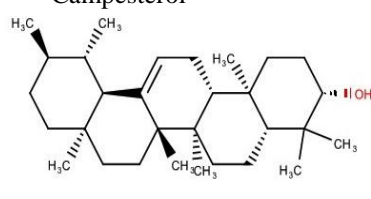

α-Amyrin

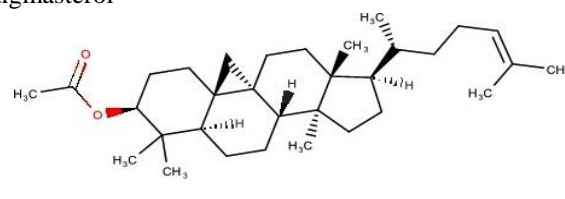

Cycloartenol acetate

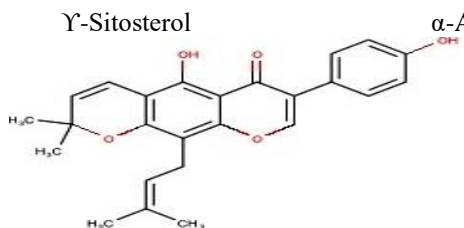

Scandone (Warangalone)

3,3'-Dimethyl-1'-hydroxy-5,8-dimethoxy-2,2'-binaphthalene-1,4,5',8'-tetrone

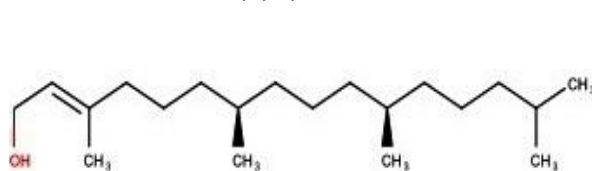

3,7,11,15-Tetramethyl-2-hexadecen-1-ol

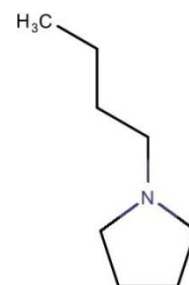

1-Butylpyrrolidine

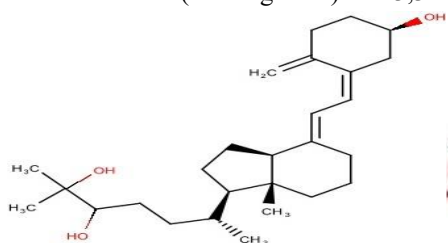

24,25-Dihydroxyvitamin D

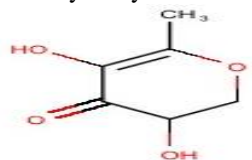

4H-Pyran-4-one, 2,3-dihydro, -3,5-dihydroxy-6-methyl

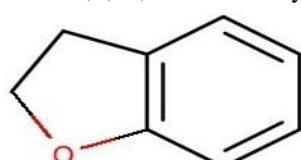

Benzofuran, 2,3-dihydro-

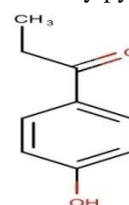

4-Hydroxy-2-methylacetophenone

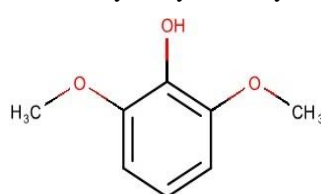

Phenol, 2,6-dimethoxy-

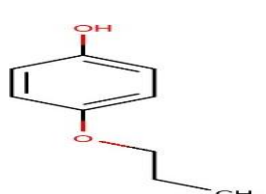

Phenol, 4-propoxy-

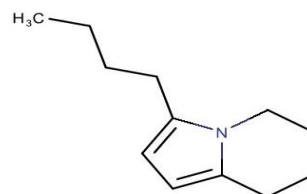

3-Butylindolizidine

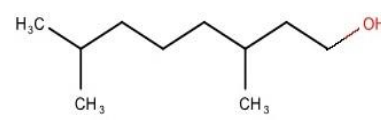

Dihydrogeraniol

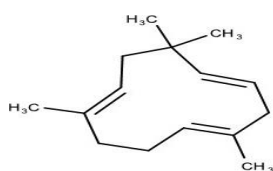

α-Caryophyllene (Humelene)

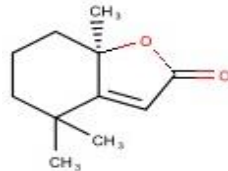

2(4H)-Benzofuranone 5,6,7,7a-tetrahydro-4,4,7a-trimethyl-(R)-

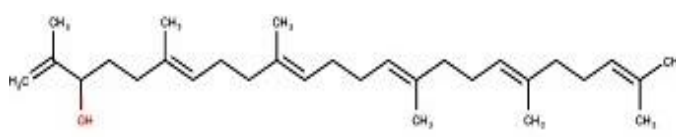

Squalene

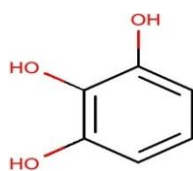

Pyrogallol

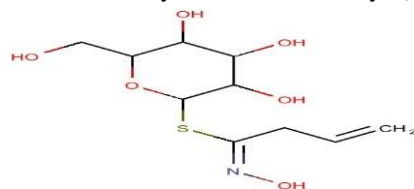

Desulphosinigrin

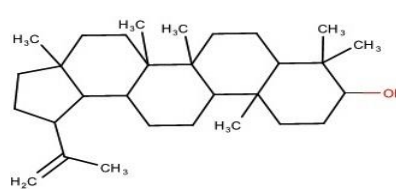

Lupeol
